# Supplementary material for: Tuning the Coefficient of Thermal Expansion of Transparent Lithium Aluminosilicate Glass-Ceramics by a Two-Stage Heat Treatment
Source: MDPI journal article supplement (doi:10.3390/ceramics7010001), 2023-12-22
Supplement: s1 [file s1]

## Supplementary Materials

# Tuning the Coefficient of Thermal Expansion of Transparent Lithium Aluminosilicate Glass-Ceramics by a Two-Stage Heat Treatment

Andrey S. Naumov\*, Georgiy Yu. Shakhgildyan, Nikita V. Golubev, Alexey S. Lipatiev, Sergey S. Fedotov, Roman O. Alekseev, Elena S. Inga'teva, Vitaliy I. Savinkov, Vladimir N. Sigaev

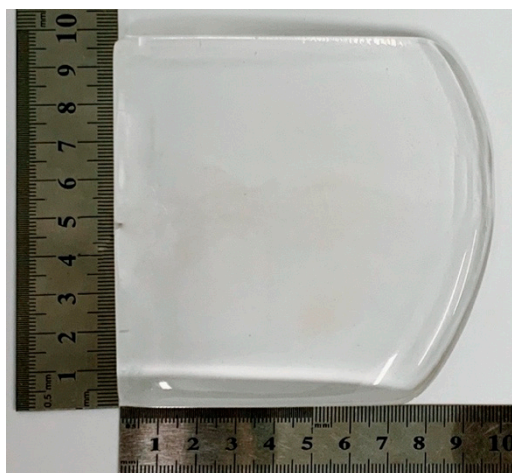

**Figure S1.** Photo of the synthesized LAS glass block.

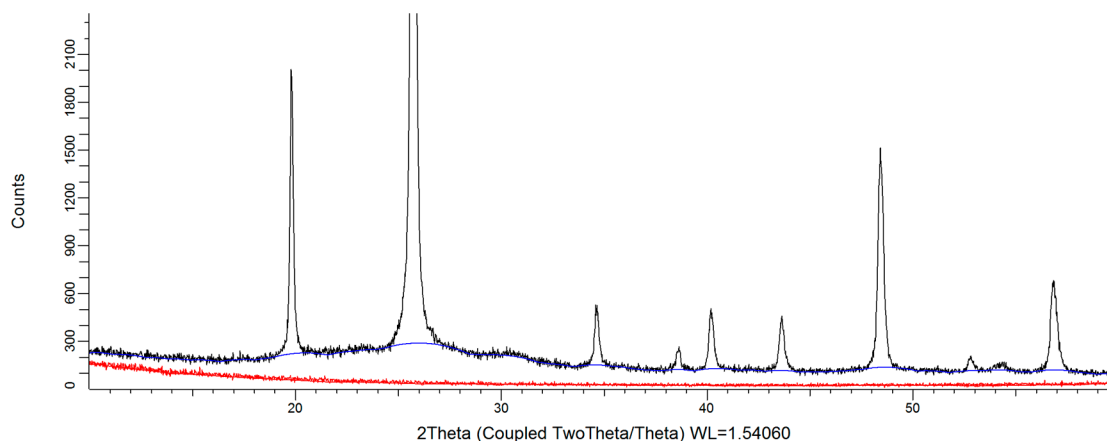

**Figure S2.** XRD patterns of one of the glass-ceramic samples and an empty silicon-made low-background specimen holder used to estimate the instrumental background profile.

The crystallized fraction was evaluated as  $100 \cdot (A_p/A_x)$ , where  $A_x$  and  $A_p$  are, respectively, the area of the whole XRD pattern (without background) and the area of the peaks considered as the area outside of the broad amorphous XRD pattern. The area of the whole XRD pattern (without background) was obtained by subtracting the area under the red curve from the area under the black pattern. The area of the black pattern above the blue line refers to the area of the peaks.

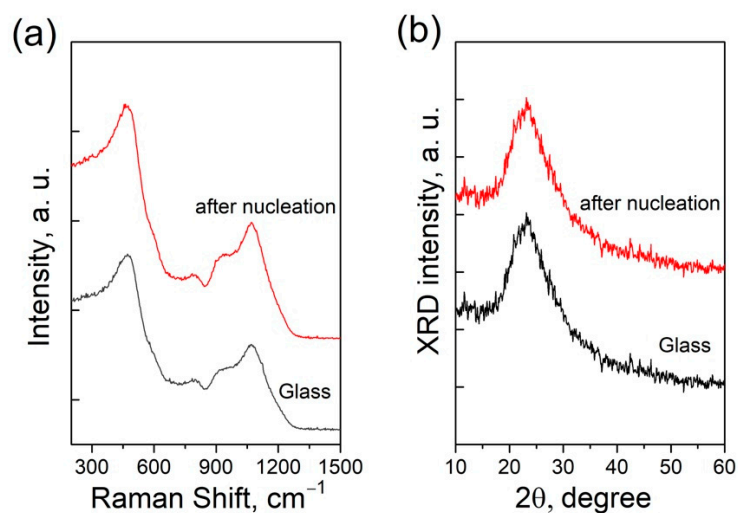

**Figure S3.** (a) Raman spectra and (b) XRD patterns of initial glass and glass obtained after the nucleation pre-treatment at 670 °C for 2 h.

**Table S1** Detailed ICP-OES instrumental settings

|                                        |                  |                  |
|----------------------------------------|------------------|------------------|
| ICP-OES                                | Agilent 5800 VDV |                  |
| RE power (W)                           | 1300 W           |                  |
| Elements measured and wavelengths (nm) | Si               | 251.432; 251.611 |
|                                        | Al               | 237.312; 396.125 |
|                                        | Li               | 610.365; 670.783 |
|                                        | P                | 177.434; 213.618 |
|                                        | Ti               | 336.122; 337.280 |
|                                        | Zr               | 327.307; 343.823 |
|                                        | Zn               | 206.200; 334.502 |
|                                        | Mg               | 279.553; 280.270 |
|                                        | Ba               | 230.424; 455.403 |
|                                        | Ca               | 393.366; 422.673 |
|                                        | As               | 188.980; 193.696 |
|                                        | Sb               | 206.834; 231.146 |
| Replicate read time (s)                | 5                |                  |
| Replicates measured                    | 3                |                  |

**Table S2** Crystallization peak temperatures determined from the DSC curves (Figures 2 and 3) and calculated  $T'_P - T_P$  parameter.

| Heat treatment for 2 h    |            |                     | Heat treatment at 670 °C |            |                     |
|---------------------------|------------|---------------------|--------------------------|------------|---------------------|
| Treatment temperature, °C | $T_P$ , °C | $(T'_P - T_P)$ , °C | Treatment duration, h    | $T_P$ , °C | $(T'_P - T_P)$ , °C |
| 625                       | 857        | 10                  | 1                        | 839        | 28                  |
| 650                       | 839        | 28                  | 2                        | 831        | 36                  |
| 670                       | 831        | 36                  | 4                        | 829        | 38                  |
| 688                       | 834        | 33                  |                          |            |                     |
| 700                       | 843        | 24                  |                          |            |                     |
| 725                       | 866        | 1                   |                          |            |                     |
